# Supplementary material
Source: PubMed Central journal article supplement (PMC6329982)
Supplement: pnas.1714990116.sapp.pdf [file pnas.1714990116.sapp.pdf]

1 **Supporting Information Appendices**

2

3 **A salivary effector enables whitefly to feed on host plants by eliciting salicylic acid-**  
4 **signaling pathway**

5

6 Hong-Xing Xu, Li-Xin Qian, Xing-Wei Wang, Ruo-Xuan Shao, Yue Hong, Shu-Sheng Liu and  
7 Xiao-Wei Wang

8

9 **Materials and Methods**

10 **Insects and plants.** The whitefly cryptic species used were MED1 (*mtCOI* GenBank:  
11 GQ371165), MEAM1 (*mtCOI* GenBank: GQ332577), Asia II 3 (*mtCOI* GenBank: DQ309076),  
12 Asia II 1 (*mtCOI* GenBank: AJ867557) and China 2 (*mtCOI* GenBank: AY686072). All  
13 whitefly cultures were reared on cotton plants in climate chambers at 27±1 °C, 14 h light: 10 h  
14 dark photoperiod and 70±10 % relative humidity. All insect-host plant experiments were  
15 conducted at this temperature and light regime. Whitefly adults within three days post-  
16 emergence were used in all bioassays.

17 Seeds of cotton (*Gossypium hirsutum* cv. Zhe-mian 1793) and tobacco (*Nicotiana tabacum*  
18 cv. NC89 and *N. benthamiana*) were from our lab. NahG (1) tobacco (*N. tabacum* var. Samsun  
19 NN, a transgenic plant that does not accumulate SA) seeds were kindly provided by Prof. Han-  
20 Song Dong (Nanjing Agricultural University, China). All the plants were cultivated singly in  
21 pots in a greenhouse under natural lighting supplemented with artificial illumination (light  
22 05:00 – 18:00 h) and controlled temperature at 25 ± 3 °C. The tobacco plants used in this study  
23 were all at the five-to-six true-leaf stage unless otherwise specified.

24

25 **Analysis of SA, JA, JA-Ile, ABA and IAA.** The phytohormones were analyzed as described  
26 previously (2). Briefly, after different treatments, the third tobacco leaf from the top was  
27 harvested and powdered in liquid nitrogen. Each treatment was replicated six to eight times.  
28 Phytohormone extraction was performed by adding 1 mL of ethyl acetate containing 10 ng of  
29 D4-SA, IAA-D2, ABA-D6 and D6-JA, and 1 ng JA-Ile-D6 to 150 mg of leaf powder. All  
30 samples were then vortexed for 10 min and centrifuged at 14,000 rpm for 20 min at 4 °C.  
31 Supernatants were collected and evaporated using a vacuum concentrator to dry at 30 °C.  
32 Residues were resuspended in 250 µL of MeOH: H<sub>2</sub>O (70:30, v/v) and centrifuged at 13,000  
33 rpm for 10 min. The supernatants were then collected and analyzed with a high-performance  
34 liquid chromatography-tandem mass spectrometry system (TripleTOF 5600+, AB Sciex).

35

36 **Exogenous amplification of SA.** Tobacco plants were treated with SA solution and whitefly  
37 performance assessed. For each plant, *ca* 5 ml of 5 µM SA (Sigma-Aldrich, purity > 99%)  
38 solution was sprayed on tobacco leaves once a day. Control plants were treated with 5 ml  
39 distilled water. After tobacco plants were sprayed for three days, tobacco plants were used for  
40 defense-marker gene expression analyses and whitefly bioassays. Whitefly bioassays were  
41 performed as described in the main text and each plant included 2 clip cages. Tobacco plants  
42 were still sprayed with 5 µM SA or distilled water once a day during bioassays. Three days  
43 after the release of whiteflies, the numbers of live adults and eggs deposited on the leaf within  
44 clip cages were counted. Each clip cage was treated as a biological replicate; 16 replicates were  
45 performed for each treatment.

46

47 **Quantitative real-time PCR (qRT-PCR) analysis.** To measure the expression levels of  
48 marker genes in SA-JA pathways, total RNA was isolated from 100 mg tobacco leaves. cDNA

49 was synthesized using PrimeScript™ RT reagent kit with gDNA Eraser (Takara, Dalian,  
50 China). qRT-PCRs were performed using the CFX96™ Real-Time PCR Detection System  
51 (Bio-Rad, USA) with SYBR Premix Ex Tag II (Takara, China). Six to twelve biologically  
52 independent replicates (plants) were conducted for each treatment and each gene was analyzed  
53 in triplicate. The reference gene *GAPDH* was used for transcript normalization. Primers are  
54 shown in Table S3.

55 For gene expression analyses of whitefly *Bt56* genes, total RNA was extracted from  
56 different developmental stages (eggs, nymphs, pseudopupae, female and male adults) and  
57 different tissues (salivary gland, midgut and ovary) of MED1. To detect the expression levels of  
58 *Bt56* gene in different species of whiteflies, total RNA was extracted from whitefly adults two  
59 days after emergence. All the experiments were repeated three times independently. qRT-PCR  
60 was performed as described above. The primer pairs for *Bt56* and reference gene *TAF* (TATA  
61 box binding protein associated factor) gene (3) are shown in Table S3.

62

63 **Clone and sequence analysis of Bt56 gene.** Total RNA was extracted from the adults of the  
64 five species of whiteflies using SV total RNA isolation system (Promega, USA) and then  
65 reverse transcribed into 1<sup>st</sup>-strand cDNA with Prime script™ RT reagent kit for RT-PCR  
66 (Takara, Dalian, China), following the manufacturer's protocol. The full-length *Bt56* gene was  
67 obtained using a SMARTer RACE Kit (Takara, Dalian, China). Primers used for PCR  
68 amplifying *Bt56* genes are listed in Table S3. The PCR products were cloned into a pMD18-T  
69 vector (Takara) and sequenced. Sequences amplified from each species of whiteflies were  
70 blasted against the non-redundant database at the NCBI website (<http://www.ncbi.nlm.nih.gov/>)  
71 to search for orthologous genes. The predicted protein sequences were analyzed by SignalP 4.1  
72 Server to predict the presence of signal peptides and cleavage sites

73 (<http://www.cbs.dtu.dk/services/SignalP/>). TMHMM Server v. 2.0  
74 (<http://www.cbs.dtu.dk/services/TMHMM/>) was used for identifying transmembrane domains.  
75 Protein sequence alignment was performed by Clustal Omega  
76 (<http://www.ebi.ac.uk/Tools/msa/clustalo/>).

77

78 **Overexpression of *Bt56* gene in tobacco.** The sequence corresponding to the ORF encoding  
79 the mature protein of *Bt56* was amplified and ligated into binary vector pCABMIA1300-35S to  
80 generate a 35S::*Bt56* recombinant vector. The recombinant vector was validated by sequencing  
81 and transformed into *Agrobacterium tumefaciens* strain GV3101. When recombinant *A.*  
82 *tumefaciens* strains were grown in LB medium (50 mg/L Kan, 50 mg/L Rif) at 28 °C to an  
83 OD<sub>600</sub> of 0.6, the cultivated cells were collected by centrifuging and resuspended in infiltration  
84 buffer (10 mM MES, 10 mM MgCl<sub>2</sub>, 200 µM acetosyringone, pH5.7) to OD<sub>600</sub> = 1. Three hour  
85 after resuspension, leaves of tobacco at the four-to-five true-leaf stage were infiltrated with *A.*  
86 *tumefaciens*. Tobacco leaves (the infiltrated area) were harvested at the time points shown in  
87 Fig. S3B for RNA isolation and cDNA synthesis. The cDNA samples were subjected to PCR  
88 reactions to detect the overexpression of *Bt56* gene. Primers used for *Bt56* detection are listed  
89 in Table S3.

90 Whitefly bioassays were performed 48 h after infiltration. Clip cages were fixed on the  
91 abaxial surface of the infiltrated leaf areas and five female adults were released into each clip  
92 cage (4). Three days after the release of whiteflies, the number of live adults and eggs laid on  
93 the leaf within clip cages were counted to assess whitefly performance. For whitefly life span  
94 assays, five male and five female adults were released into each clip cage. The number of live  
95 adults within cages was counted at 1, 3, 5, 7 and 9 days after release.

96 For phytohormones and defense-marker genes expression analysis, tobacco leaves (the  
97 infiltrated area of the third leaf from the top) were harvested 48 h after infiltration and analyzed  
98 as described in the main text.

99

100 **RNAi experiments.** To silence the *Bt56* gene, we fed whiteflies with artificial diet containing  
101 *dsRNA* (15 % sucrose solution, 200 ng / $\mu$ l *dsRNA*) using an artificial diet feeding device as  
102 previously described (5). Two days after feeding *dsRNA*, the RNAi efficiency was analyzed by  
103 qRT-PCR. Bioassays of *Bt56*-silenced whiteflies on uninfested control tobacco, *Bt56*  
104 overexpressed tobacco and empty vector expressed tobacco were performed as described  
105 above. For analyses of phytohormone levels and defense-marker gene expression, tobacco  
106 leaves were harvested three days after they were infested by *Bt56*-silenced whiteflies and  
107 analyzed as described in the main text.

108 To investigate the influence of *Bt56*-knockdown on whitefly life span on tobacco, cotton  
109 and artificial diet, *Bt56*-silenced whiteflies were released into clip cages, 5 female and 5 male  
110 adults in each cage. Every two days, the number of live whiteflies was counted. Six plants were  
111 used for each treatment and each plant included two clip cages. Twelve replicates were  
112 conducted for each treatment.

113

114 **Bt56 protein expression and antibody preparation.** The sequence encoding mature protein of  
115 Bt56 was cloned into the pET-28a expression vector to express the protein fused with His tag.  
116 The recombinant plasmid was transferred to *Escherichia coli* strain Rosetta 2. The fusion  
117 protein was induced by 0.1 mM IPTG in 37 °C for 4 h. Cell cultures were collected and  
118 disrupted by ultrasound. The soluble fusion protein was purified by Ni Sepharose 6 Fast Flow

119 (GE Healthcare, USA) following the manufacturer's protocol. Polyclonal antiserum was raised  
120 by immunizing rabbits with the purified fusion protein and then polyclonal anti-Bt56 antibody  
121 was purified on protein A agarose from antiserum.

122

123 **FISH and IHC.** To localize the transcript of *Bt56* in individual whitefly tissues, FISH was  
124 performed using a short oligonucleotide probe for *Bt56* (5' - Cy3 -  
125 AACGCGCTTGAAAGCTTCAGCA - 3'). PSG, midgut and ovary were dissected from  
126 whitefly adults in phosphate-buffered saline (PBS) and used for FISH assays as described  
127 previously (6). Short oligonucleotide probe for GFP (5'-Cy3-  
128 ACAAGACCCGCGCCGAGGTG - 3') and no probe were used as controls. The location of  
129 protein Bt56 in PSG, midgut and ovary was detected by immunohistochemical (IHC) staining  
130 as previously described (7).

131

132 **Sample preparation for whitefly- infested plants, whitefly body parts and whitefly saliva.**

133 Approximately 5000 whiteflies were released to feed on each cotton and tobacco plant for 24 h  
134 and then adults and eggs were removed carefully from each leaf. Whitefly-infested plant leaves  
135 and whiteflies were harvested separately and homogenized in liquid nitrogen. Approximately  
136 500 head and thorax parts and abdomen parts were dissected from whitefly adults and  
137 homogenized in a FastPrep-24 Instrument (MP Biomedicals Inc.). The protein samples were  
138 extracted using RIPA lysis buffer (Beyotime, China). After centrifuging at 12,000 g for 10 min  
139 at 4 °C, the supernatant was filtrated through a 0.45- $\mu$ m membrane and then concentrated using  
140 Amicon Ultra 3-kDa centrifugal filter device (Millipore).

141 To collect whitefly saliva, *ca* 40,000 whiteflies were transferred to the artificial diet  
142 feeding device (5) for 24 h in climate chambers as described above. Resorcinol is a

143 neurostimulant that has been used successfully to enhance aphid salivation (8). In order to  
144 collect more whitefly salivary proteins, 0.4% resorcinol diet was used (1 ml per device with 400  
145 whitefly adults). Approximately 100 ml saliva-containing diet (from 100 feeding devices) was  
146 collected after feeding, and concentrated to 30  $\mu$ l using Amicon Ultra 3-kDa centrifugal filter  
147 device. After adding 5 $\times$ SDS loading buffer to the concentrated proteins, the protein samples  
148 were analyzed by SDS-PAGE.

149

150 **Western blot.** To detect Bt56 protein in whitefly body parts, whitefly-infested plant leaves and  
151 whitefly saliva, western blot was performed using purified anti-Bt56 polyclonal antibody. The  
152 protein samples (*ca* 100  $\mu$ g protein extracted from whitefly and plant, and 5  $\mu$ g collected saliva  
153 from 40,000 whiteflies) were isolated by 15% SDS-PAGE and transferred onto a PVDF  
154 membrane. PVDF membrane was blocked with 5% instant nonfat dry milk for 2 h at room  
155 temperature, and then incubated with purified polyclonal antibody (1:500 dilution) overnight.  
156 The antigen-antibody complexes were visualized using a goat anti-rabbit IgG-conjugated  
157 horseradish peroxidase (HRP) antibody (MultiSciences Biotech) at a 1:10,000 dilutions and  
158 detect using a ECL Plus Detection System (Bio-Rad, Hercules, CA, USA) with the Molecular  
159 Imager® ChemiDoc™ XRS System (Bio-Rad, Hercules, CA, USA). The monoclonal anti-Vg  
160 antibody (5, 9) was used to detect whitefly vitellogenin protein and the goat anti-mouse IgG-  
161 conjugated HRP was used as secondary antibody (MultiSciences Biotech).

162

163 **Analysis of whitefly feeding behaviors by electrical penetration graph (EPG).** The feeding  
164 behaviors of *Bt56*-silenced whiteflies on cotton were monitored using an 8-channel DC-EPG  
165 device (EPG systems, Wageningen University, The Netherlands) in an electrically grounded  
166 Faraday cage in a temperature-controlled room ( $27 \pm 1$  °C). The *dsGFP*- and *dsBt56*-fed

167 whiteflies were released onto cotton for three days and then used for EPG assays. A gold wire,  
168 2-cm long and 12.5- $\mu$ m in diameter, was glued to the dorsum of the whitefly using a water-  
169 soluble silver conductive paint (Colloidal Silver; Ted Pella, Inc.). The other end of the wire was  
170 connected to the Giga-8 DC EPG amplifier through the EPG probe. Whiteflies glued to the gold  
171 wire were carefully moved to the abaxial surface of cotton leaves. The plant electrode was a  
172 hard copper wire inserted into the soil. The EPG waveforms were analyzed with PROBE 3.4  
173 (Wageningen University, The Netherlands). A total of 76 *dsBt56*-fed whiteflies and 35 *dsGFP*-  
174 fed whiteflies were used for EPG assays. Only the data from whiteflies achieving at least one  
175 phloem ingestion period were used for parameter analysis (Table S1).

176

177 **Phylogenetic analysis.** The alignment of KNOX proteins was performed by Clustal Omega  
178 (<https://www.ebi.ac.uk/Tools/msa/clustalo>) and phylogenetic trees were constructed by  
179 MEGA5 software (neighbor-joining method) using bootstrap values performed on 1,000  
180 replicates and the 50% value was accepted as an indicator of a well-supported branch. BLR  
181 (accession no. AAP93641) and BEL1 (AAM62510) were used to create an out-group. The  
182 KNOX proteins accession numbers were: STM (Q38874), KNAT1 (AAM03027), KNAT2  
183 (P46640), KNAT3 (P48000), KNAT4 (P48001), KNAT5 (P48002), KNAT6 (NP\_850951),  
184 KNAT7 (NP\_564805), PpKNOPE3 (DQ786755), MtKNOX3 (ABO33480), MtKNOX4  
185 (ABO33481), MtKNOX5 (ABO33482), MdKNAP3 (Z71980), NTH20 (AB025714), NTH22  
186 (AB025715), NtH23 (BAA25921), NtH201 (BAF95776), Osh45 (BAA08552), LeT12  
187 (AAC49918).

188

189 **Laser capture microdissection (LCM) and phloem sap collection.** The samples were fixed  
190 and embedded as described previously (10). Tobacco leaves were fixed in 4%



191 paraformaldehyde under reduced pressure overnight. The samples were then immersed in  
192 progressively more concentrated sucrose solution (5%, 10%, 20%, 30%) for 1 h each at room  
193 temperature for dehydration, and then immersed in 30% sucrose solution: OCT compound  
194 (SAKURA) (1:1 v/v) for 1 h. Finally, the samples were embedded in OCT compound and  
195 frozen in -80 °C for 30 min. Laser capture microdissection was performed using Arcturus<sup>XT</sup>  
196 Laser Capture Microdissection (ThermoFisher) system and RNA was extracted using PicoPure  
197 RNA Isolation Kit (Arcturus) following the manufacturer's instructions. Phloem sap collection  
198 was performed as previously described ([11](#)) and RNA was extracted using Trizol reagent. RNA  
199 extracted from phloem cells were reverse transcribed to the 1<sup>st</sup>-strand cDNA. RT-PCR was  
200 performed to detect *NTH202* gene. *Altered phloem development* (*APL*, NM\_001326017) gene  
201 and *thioredoxin H* (*TRXH*, XM\_016612627.1) gene are known to be two phloem-specific  
202 genes, and *ribulose biphosphate carboxylase* (*Rubisco*, XM\_016626460.1) gene has  
203 previously been used as a marker of contamination by non-phloem tissue ([12-14](#)).

204

205 ***NTH202* promoter - GUS fusion, plant transformation and GUS staining.** To analyze the  
206 *NTH202* promoter activity, a 1600-bp genome DNA sequence ahead of the *NTH202* first exon  
207 was amplified using the primer (*NTH202* promoter F:  
208 GGAATTCAGATGATAACCATAAATGCCCGGTT and *NTH202* promoter R:  
209 CATGCCATGGGGCTAATATGGCTACTATAGAGGAGT). *NTH202* promoter was cloned  
210 in pCAMBIA1301 to generate a *NTH202* promoter::GUS recombinant vector. The recombinant  
211 vector was validated by sequencing and transformed into *A. tumefaciens* strain GV3101. Two  
212 days after *Agrobacterium*-mediated transient expression, the infiltrated leaves were collected  
213 for detecting GUS activity as described ([15](#)).

214

215 **Protein-protein interaction assays.** For *N. tabacum* cDNA library construction, total RNA  
216 was extracted from tobacco leaves infested by whiteflies at 0, 1, 2 and 3 days. The mixed RNA  
217 samples were sent to TAKARA (Dalian, China) for library construction. Y2H screen was  
218 performed using the MATCHMAKER Gold Yeast Two-Hybrid System (Clontech) following  
219 the manufacturer's protocol. *In vitro* GST pull-down assay was performed with GST- and MBP-  
220 fusion proteins as described (16). *In planta* protein interactions were investigated using BiFC  
221 assays in a *N. benthamiana* transient expression system as described, and  $\beta$ C1 was expressed  
222 with SAHH as a positive control (17).

223

224 **VIGS assays.** To silence *NTH202* gene in tobacco, VIGS assays were performed (18). Briefly,  
225 a 192-bp fragment (1029-1321 of *NTH202* gene, GenBank accession no. KY986874) was  
226 cloned into *Xba*I-*Bam*HI-digested pBIN2mDNA1 plasmid to generate the gene-silencing vector  
227 2mDNA1-*NTH202*. After the 2mDNA1-*NTH202* vector was sequenced to confirm the fidelity  
228 of the inserts, it was transformed into *A. tumefaciens* strain EHA105 by electroporation.  
229 Tobacco curly shoot virus (TbCSV) was used as a helper virus in the VIGS assay. Equal  
230 volume *A. tumefaciens* (OD<sub>600</sub> = 0.6) carrying TbCSV construct and *A. tumefaciens* carrying  
231 2mDNA1-*NTH202* construct were mixed and co-infiltrated into the stem and leaves of each  
232 plant at the one-to-two true-leaf stage (VIGS-silenced plants). Control plants were co-infiltrated  
233 with *A. tumefaciens* carrying the empty-vector (pBIN2mDNA1) and TbCSV. All plants were  
234 grown in a greenhouse under the same conditions as described above and cultivated to the five-  
235 to-six true-leaf stage. Then, VIGS-silenced and empty-vector control plants were used for  
236 whitefly bioassays and phytohormone determination as described above.

237

238 **References**

- 239 1. Ryals JA, *et al.* (1996) Systemic acquired resistance. *Plant Cell* 8(10):1809-1819.
- 240 2. Lu J, *et al.* (2015) Induced jasmonate signaling leads to contrasting effects on root damage  
241 and herbivore performance. *Plant Physiol* 167(3):1100-1116.
- 242 3. Su YL, *et al.* (2013) Selection of endogenous reference genes for gene expression analysis  
243 in the Mediterranean species of the *Bemisia tabaci* (Hemiptera: Aleyrodidae) complex. *J*  
244 *Econ Entomol* 106(3):1446-1455.
- 245 4. Zang LS, Liu YQ, & Liu SS (2005) A new clip- cage for whitefly experimental studies.  
246 *Chin Bull Entomol* 42(3):329-333.
- 247 5. Wei J, *et al.* (2017) Vector development and vitellogenin determine the transovarial  
248 transmission of begomoviruses. *Proc Natl Acad Sci USA* 114(26):6746-6751.
- 249 6. Kliot A & Ghanim M (2015) Fluorescent in situ hybridization for the localization of  
250 viruses, bacteria and other microorganisms in insect and plant tissues. *Methods* 98:74-81.
- 251 7. Wei J, *et al.* (2014) Specific cells in the primary salivary glands of the whitefly *Bemisia*  
252 *tabaci* control retention and transmission of begomoviruses. *J Virol* 88(22):13460-13468.
- 253 8. Chaudhary R, Atamian HS, Shen Z, Briggs SP, & Kaloshian I (2015) Potato aphid salivary  
254 proteome: Enhanced salivation using resorcinol and identification of aphid  
255 phosphoproteins. *J Proteome Res* 14(4):1762-1778.
- 256 9. Guo JY, *et al.* (2012) Enhanced vitellogenesis in a whitefly via feeding on a begomovirus-  
257 infected plant. *PLoS One* 7(8):e43567.
- 258 10. Lin S, *et al.* (2018) The distinct functions of two classical arabinogalactan proteins BcMF8  
259 and BcMF18 during pollen wall development in *Brassica campestris*. *The Plant Journal*  
260 94(1):60-76.

- 261 11. Campbell BA, Hallengren J, & Hannapel DJ (2008) Accumulation of *BELI*-like transcripts  
262 in solanaceous species. *Planta* 228(6):897-906.
- 263 12. Bonke M, Thitamadee S, Mähönen AP, Hauser M-T, & Helariutta Y (2003) APL regulates  
264 vascular tissue identity in *Arabidopsis*. *Nature* 426(6963):181.
- 265 13. Du B, *et al.* (2015) Phloem-exudate proteome analysis of response to insect brown plant-  
266 hopper in rice. *J Plant Physiol* 183:13-22.
- 267 14. Giavalisco P, Kapitza K, Kolasa A, Buhtz A, & Kehr J (2006) Towards the proteome of  
268 *Brassica napus* phloem sap. *Proteomics* 6(3):896-909.
- 269 15. Jefferson RA, Kavanagh TA, & Bevan MW (1987) GUS fusions: beta - glucuronidase as a  
270 sensitive and versatile gene fusion marker in higher plants. *EMBO J* 6(13):3901-3907.
- 271 16. Li R, *et al.* (2014) Virulence factors of geminivirus interact with MYC2 to subvert plant  
272 resistance and promote vector performance. *Plant Cell* 26(12):4991-5008.
- 273 17. Yang X, *et al.* (2011) Suppression of methylation-mediated transcriptional gene silencing  
274 by  $\beta$ C1-SAHH protein interaction during geminivirus-betasatellite infection. *PLoS Pathog*  
275 7(10):e1002329.
- 276 18. Luan JB, *et al.* (2013) Suppression of terpenoid synthesis in plants by a virus promotes its  
277 mutualism with vectors. *Ecol Lett* 16(3):390-398.

278

279 **Tables**280 **Table S1: Comparison of EPG parameters between *dsBt56*- and *dsGFP*-fed whiteflies.**

| EPG parameters                                                 | <i>dsBt56</i> (n=16)<br>(Mean ± SE) | <i>dsGFP</i> (n=16)<br>(Mean ± SE) | <i>P</i> * |
|----------------------------------------------------------------|-------------------------------------|------------------------------------|------------|
| % of whiteflies realizing at least 1 phloem ingestion phase ** | 21.1% (16/76)                       | 45.7% (16/35)                      |            |
| Time to 1 <sup>st</sup> probe (sec)                            | 2444.9 ± 834.6                      | 1574.0 ± 442.9                     | 0.364      |
| Number of probes (#)                                           | 64.8 ± 10.6                         | 64.8 ± 7.1                         | 0.996      |
| Total probing time (sec)                                       | 12405.9 ± 820.9                     | 15316.8 ± 789.9                    | 0.016      |
| Number of C periods (#)                                        | 67.7 ± 10.4                         | 68.2 ± 7.4                         | 0.969      |
| Average C duration (sec)                                       | 141.2 ± 18.3                        | 162.4 ± 21.4                       | 0.457      |
| Total time of C (sec)                                          | 7669.2 ± 729.8                      | 9363.0 ± 675.4                     | 0.099      |
| Time to the 1 <sup>st</sup> E1 (sec)                           | 14769.2 ± 1790.4                    | 14830.8 ± 1674.7                   | 0.980      |
| Number of E1 periods (#)                                       | 3.1 ± 0.5                           | 3.3 ± 0.5                          | 0.771      |
| Average E1 duration (sec)                                      | 20.7 ± 5.3                          | 24.0 ± 6.1                         | 0.677      |
| Total time of E1 (sec)                                         | 53.3 ± 11.2                         | 69.7 ± 18.0                        | 0.446      |
| Number of probes before 1 <sup>st</sup> sustained E2           | 45.1 ± 13.0                         | 39.8 ± 10.1                        | 0.749      |
| Number of E2 periods (#)                                       | 2.7 ± 0.4                           | 2.9 ± 0.4                          | 0.661      |
| Average E2 duration (sec)                                      | 440.2 ± 76.3                        | 1066.3 ± 245.2                     | 0.021      |
| Total time of E2 periods (sec)                                 | 977.7 ± 149.0                       | 2354.5 ± 420.6                     | 0.004      |
| Mean duration of a sustained E2 (sec)                          | 646.5 ± 118.2                       | 1625.5 ± 402.2                     | 0.026      |
| Number of E phases (#)                                         | 5.8 ± 0.8                           | 6.2 ± 0.9                          | 0.714      |
| Total duration of E phases (sec)                               | 1031.1 ± 147.3                      | 2424.2 ± 421.3                     | 0.004      |

281 \* Statistical significance was evaluated using one-way ANOVA.

282 \*\* The number of whiteflies realizing at least 1 phloem ingestion phase divide by the total number of  
283 whiteflies used to perform EPG analyses.

284

285 **Table S2: Y2H screened proteins from tobacco library using Bt56 as bait.**

286

---

| <b>GenBank accession</b> | <b>Annotation</b>                                                             |
|--------------------------|-------------------------------------------------------------------------------|
| XM_016619856             | Filament-like plant protein 3                                                 |
| XM_016642635             | Protein NETWORKED 1D-like                                                     |
| XM_016592181             | Protein FLX-like 2 (LOC107772699)                                             |
| XM_016580083             | Proline synthase co-transcribed bacterial homolog protein-like (LOC107761802) |
| XM_016626509             | Myosin heavy chain, cardiac muscle isoform-like (LOC107802930),               |
| KY986874                 | KNOTTED 1-like homeobox transcription factor                                  |

---

287 **Table S3: Primers used in this study.**

| Primer            | Gene/Application      | Sequences (5'-3')                                 | Modification |
|-------------------|-----------------------|---------------------------------------------------|--------------|
| Bt56 F            | Bt56/PCR              | CCTCACTTTGCAGTTACGGTCCGAT                         |              |
| Bt56 R            | Bt56/PCR              | AGGATTAGGTAATTTATTACCCGAT                         |              |
| 5'RACEGSP1        | Bt56/5'RACE           | CGGAGGCGGCATTCTTGATTGACTTGGC                      |              |
| 3'RACEGSP1        | Bt56/3'RACE           | TGCTGATCTACTGAGGGCACATGTTGAG                      |              |
| MED1 Bt56 F       | Bt56/ overexpression  | GAGGATCCATGGGTGCTACAGAGAATC                       | BamH I       |
| MED1 Bt56 R       | Bt56/ overexpression  | GAGAATTCATACAAATACATCGTAAATAAACAC                 | EcoR I       |
| Asia II 3 Bt56 F  | Bt56/ overexpression  | GAGGATCCATGGGTGCTACAGAGATTCCT                     | BamH I       |
| Asia II 3 Bt56 R  | Bt56/ overexpression  | GAGAATTCCTTAGTTGGCCTTAAAGG                        | EcoR I       |
| Bt56 T7 F         | Bt56/ RNAi            | TAATACGACTCACTATAGGGAGAAGAGATAGTAATT<br>CACGAGCCT | T7 promoter  |
| Bt56 T7 R         | Bt56/ RNAi            | TAATACGACTCACTATAGGGAGAAGTTGGCCTTAAA<br>GGAAG     | T7 promoter  |
| GFP T7 F          | GFP/ RNAi             | TAATACGACTCACTATAGGCTCGTGACCACCTGAC<br>CTAC       | T7 promoter  |
| GFP T7 R          | GFP/ RNAi             | TAATACGACTCACTATAGGGTTCACCTTGATGCCGT<br>TCTT      | T7 promoter  |
| Bt56 qRT F        | qRT-PCR for MED1      | TTGTCCGAGGTGCTACAGAG                              |              |
| Bt56 qRT R        | qRT-PCR for MED1      | GTGCCCTCAGTAGATCAGCA                              |              |
| qBt56 F           | qRT-PCR for both      | GGCGTCGTGGTGCTTGTAA                               |              |
| qBt56 R           | MED1 and Asia II 3    | GGAATCCTCGGATCGTTTGA                              |              |
| TAF qRT F         | qRT-PCR               | TGTGGGACACCCATTATCAG                              |              |
| TAF qRT R         | qRT-PCR               | TGTGCAGCCAAGGAAATAAG                              |              |
| q PAL F           | qRT-PCR               | AAGAAGCGTTCGGTGTGCTG                              |              |
| q PAL R           | qRT-PCR               | TCGGGCTTTCCATTCATCACC                             |              |
| q NPR1 F          | qRT-PCR               | GCTGTAGCGTTCCTTGTTGA                              |              |
| q NPR1 R          | qRT-PCR               | AGGCCTTATCAAGGGTTATG                              |              |
| q PR1a F          | qRT-PCR               | GTGTAGAACCTTTGACCTGGGA                            |              |
| q PR1a R          | qRT-PCR               | TTCGCCTCTATAATTACCTGGA                            |              |
| q GAPDH F         | qRT-PCR               | GCAGTGAACGACCCATTTATCTC                           |              |
| q GAPDH R         | qRT-PCR               | AACCTTCTTGGCACCACCCT                              |              |
| Bt56-MED1 BK F    | MED1 Bt56/ Y2H        | GAGAATTCATGGGTGCTACAGAGAATC                       | EcoRI        |
| Bt56-MEAM1 BK F   | MEAM1 Bt56/ Y2H       | GAGAATTCATGGGTGCTACAGAGATTCTT                     | EcoRI        |
| Bt56-AsiaII1 BK F | AsiaII1 Bt56/ Y2H     | GAGAATTCATGGGTGCTACAGAGATTCTT                     | EcoRI        |
| Bt56-AsiaII3 BK F | AsiaII3 Bt56/ Y2H     | GAGAATTCATGGGTGCTACAGAGATTCTT                     | EcoRI        |
| Bt56-China2 BK F  | China2 Bt56/ Y2H      | GAGAATTCATGGGATTCCTGACGCTGAT                      | EcoRI        |
| Bt56-BK R         | Bt56/ Y2H             | GAGGATCCTTAGTTGGCCTTAAAGG                         | BamH I       |
| GST-BT56 F        | Bt56/ prokaryotic     | GAGGATCCATGGGTGCTACAGAGAATC                       | BamH I       |
| GST-BT56 R        | expression            | GAGAATTCCTTAGTTGGCCTTAAAGG                        | EcoR I       |
| MBP-NTH202F       | NTH202/ prokaryotic   | CGCGGATCCATGGCGTTTCAGGACCATTTTTCT                 | BamH I       |
| MBP-NTH202R       | expression            | CCGGAATTCTCACTGCTTGATTTACCTGCACT                  | EcoR I       |
| Bt56-2Yc F        | Bt56/ BiFC            | CCCTTAATTAACATGGGTGCTACAGAGAATC                   | PacI         |
| Bt56-2Yc R        | Bt56/ BiFC            | GGGACTAGTTTAGTTGGCCTTAAAGG                        | SpeI         |
| NTH202-2Yn F      | NTH202/ BiFC          | CCCTTAATTAACATGGCGTTTCAGGACCATTTT                 | PacI         |
| NTH202-2Yn R      | NTH202/ BiFC          | GGGACTAGTTCACTGCTTGATTTACCT                       | SpeI         |
| Bt56-GFP F        | Bt56/ co-localization | GGGGTACCATGGGTGCTACAGAGAATCCT                     | KpnI         |
| Bt56-GFP R        |                       | CGGGATCCGTTGGCCTTAAAGGAAGAGAAAG                   | BamHI        |
| NTH202-CFP F      | NTH202/ co-           | GGGGTACCATGGCGTTTCAGGACCATTTTTT                   | KpnI         |
| NTH202-CFP R      | localization          | CGCGGATCCCTGCTTGATTTACCTGCA                       | BamHI        |
| NTH202 VIGS F     | KN1/ VIGS             | GCTCTAGACTAAGTGGCCTTATCCAAC                       | XbaI         |
| NTH202 VIGS R     | KN1/ VIGS             | CGGGATCCCCAAAACTTAGTAGTTTCAGT                     | BamH I       |
| q NTH202 F        | qRT-PCR               | CGCGGATCCATGGCGTTTCAGGACCATTTTTCT                 |              |
| q NTH202 R        | qRT-PCR               | CCGGAATTCTCACTGCTTGATTTACCTGCACT                  |              |
| APL F             | PCR                   | ATGTTCCATGCCAAGAAACCTTCAACT                       |              |
| APL R             | PCR                   | TTACCCGAAAACAGAGTTTCGTCCACC                       |              |
| Rubisco F         | PCR                   | GTGGGCAACTATGCAATGACC                             |              |
| Rubisco R         | PCR                   | TAATTGGTGGCCACACCTGC                              |              |
| TRXH F            | PCR                   | ACTGAAGACTGTTGCGGAGG                              |              |
| TRXH R            | PCR                   | TGCACAAATCAGATTCCAAGCA                            |              |
| NTH202 promoter F | Promoter              | GGAATTCAGATGATAACCATAAATGCCCCGGTT                 | EcoRI        |
| NTH202 promoter R | Promoter              | CATGCCATGGGGCTAATATGGCTACTATAGAGGAGT              | NcoI         |

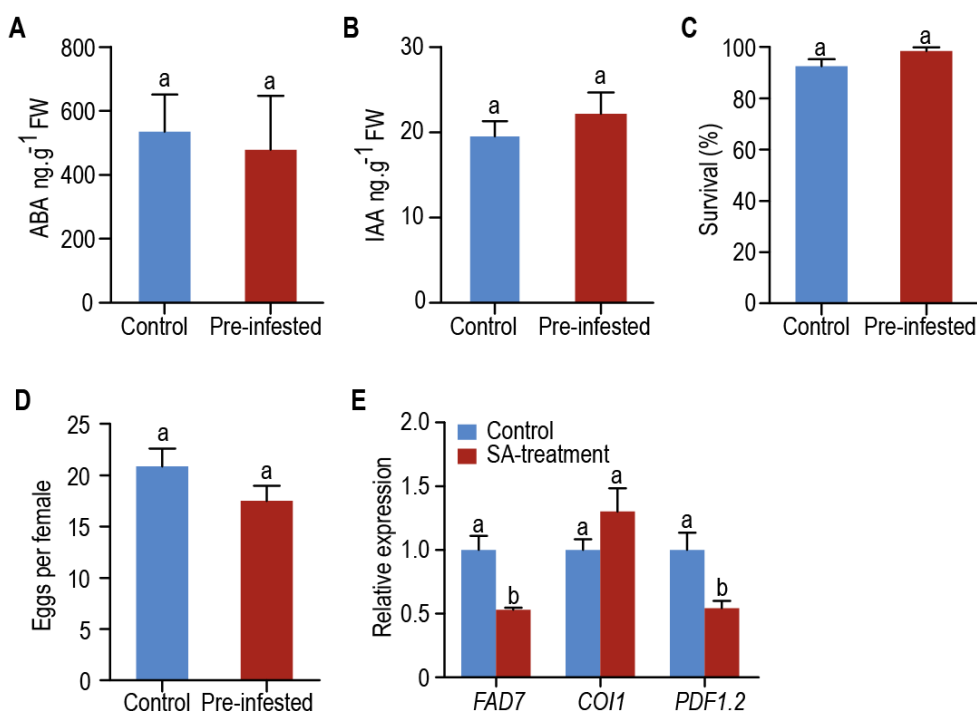

289 **Fig. S1. The levels of ABA and IAA in whitefly-infested tobacco plants.** Three days after  
 290 whitefly infestation, the mean levels of ABA (A) and IAA (B) in control and pre-infested  
 291 tobacco plants were measured ( $n = 6$ ). (C-D) Whitefly pre-infestation tests were performed  
 292 using NahG tobacco (a transgenic plant that does not accumulate SA). Whiteflies were allowed  
 293 to feed on whitefly pre-infested and uninfested control NahG tobacco plants for three days. The  
 294 survival (C) and fecundity (D) of whiteflies were examined. Each treatment included 6 plants  
 295 and each plant had 2 clip cages ( $n = 12$ ). (E) Expression levels of defense-marker genes in JA-  
 296 signaling pathway of control and SA-treated tobacco plants ( $n = 6$ ). Data shown are mean  $\pm$  SE.  
 297 Letters above the bars indicate significant difference  $P < 0.05$  (Nested ANOVA for whitefly  
 298 bioassays and one-way ANOVA for other experiments).



```

1      AGCGATTAGATCGCCAAATAATCGTAGAATTATCGGAACTCAATTTCAAAAAATAGCAAT
61     TTTACTGTTGGAAAATTCTGCTTGGGTACTAGCCGTTATATTTTACCCAAAAAAAATGC
121    AAAAAACAATTATTATGTATTAGACTTTAAAAACACACCAATTTCCATGTTTTTTTCGAG
181    CGCCCCTGAACACTTTTCTTTCTGCCGTGCGATCACCTGTATCTTTGCGTGATTTCGATTT
241    AGTGCGCACTGATGTTCATGCAATCGACAGTCCGAACTTAATCACTCCCCGCAGATTTTTT
301    AGTTCGCATGGAAAATACTATATTTCTGACGATATTGGCCACGCCAGACTTTTGAACGAG
361    CGTCATACAATATGCCTTGCAGACGAGTACCCATGTTTGCCCCAATCAGGAAGGGGGGGG
421    GGGGAAGAAATGCACGTCCTTGGATGATGTTCAGCACGCAAGGAGCAAAATTGAATTTTAG
481    CAGAACATTGAATTGATACGCCCTCACTTTGCAGTTACGGTCCGATGTTCCCTCGAAAAAT
                                         M F P R K M
541    GCATTCTAGCGGGTTGATTGCTTTTGGCGTTCGTGGTGCTTGTAACAAGCGTTGTCGGAGG
      H S S G L I A F G V V V L V T S V V G G
601    TGCTACAGAGAATCCTGACGCTGATAAAGAGATAGTAATTCACGAGCCTGCTGAAGCTTT
      ▲ A T E N P D A D K E I V I H E P A E A F
661    CAAGCGCGTTATTAACCTATGCTGATCTACTGAGGGCACATGTTGAGAACCTGCGTCAAAC
      K R V I N Y A D L L R A H V E N L R Q T
721    GATCCGAGGATTCCTGCAAAACAGCGTAACCGTAATGGACACGACCAGGAACATTTTGAG
      I R G F L Q N S V T V M D T T R N I L R
781    AACCGAGAAAAAGCAAGCCAAGTCAATCAAGAATGCCGCCTCCGAGGCCATTAGGTCTTT
      T E K K Q A K S I K N A A S E A I R S F
841    CTCTTCCTTTAAGGCCAACTAATAAAATTGCATGGAGGTGTACATGTTAACATCTAGAGA
      S S F K A N *
901    ATGGAAGTTATAATACTTATACTTACAGATTGTGTTTATTTACGATGTATTTGTATTTTA
961    AATCGGTGAATAAATTACCTAATCCTGAACTAGAAAAAAAAAAAAAAAAAAAAAAAAA

```

299 **Fig. S2.** Nucleotide sequence of transcript *Bt56* and deduced amino acid sequence of protein  
300 *Bt56*. The underline shows the signal peptide predicted by SignalP-HMM and SignalP 4.1, and  
301 the arrow shows the most likely signal peptide cleavage site predicted by SignalP-NN.

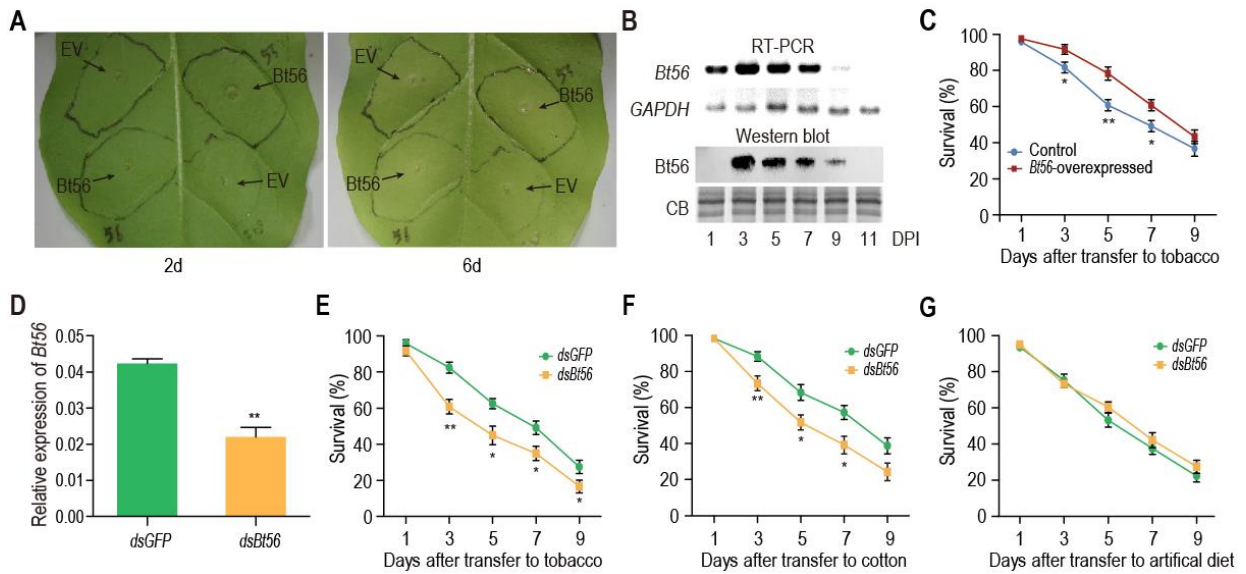

302 **Fig. S3.** Overexpression and silencing of *Bt56* gene. (A) Overexpression of *Bt56* by  
 303 agroinfiltration did not induce chlorosis or cell death in *N. tabacum* two and six days after  
 304 agroinfiltration. EV, empty vector. (B) Semi-quantitative RT-PCR on RNA and western blot on  
 305 proteins from *N. tabacum* transiently overexpressing *Bt56* at different time points. The plant  
 306 *GAPDH* gene was used as an internal control. Coomassie blue (CB) staining was used to  
 307 confirm equal loading. DPI, days post infiltration. (C) Survival ratio of whiteflies feeding on  
 308 *Bt56*-overexpressed tobacco for 9 days. Each treatment included 6 plants and each plant had 2  
 309 clip cages (n = 12). (D) The efficiency of RNAi by feeding *dsRNA*. After whiteflies had fed on  
 310 15% sucrose solution containing 200 ng *dsBt56* or *dsGFP* for 48 h, the transcript levels of *Bt56*  
 311 were examined by qRT-PCR (n = 3). (E-G) Survival ratio of whiteflies feeding on tobacco  
 312 plants (E), cotton plants (F), and artificial diet (G) for 9 days after they started to feed on each  
 313 of the substrata; the artificial diet contained *dsGFP* or *dsBt56*. Each treatment included 6 plants  
 314 and each plant had 2 clip cages (n = 12). Values shown are mean  $\pm$  SE, nested ANOVA was  
 315 performed for whitefly bioassays and one-way ANOVA for other experiments, LSD test, \* $P$  <  
 316 0.05, \*\* $P$  < 0.01.

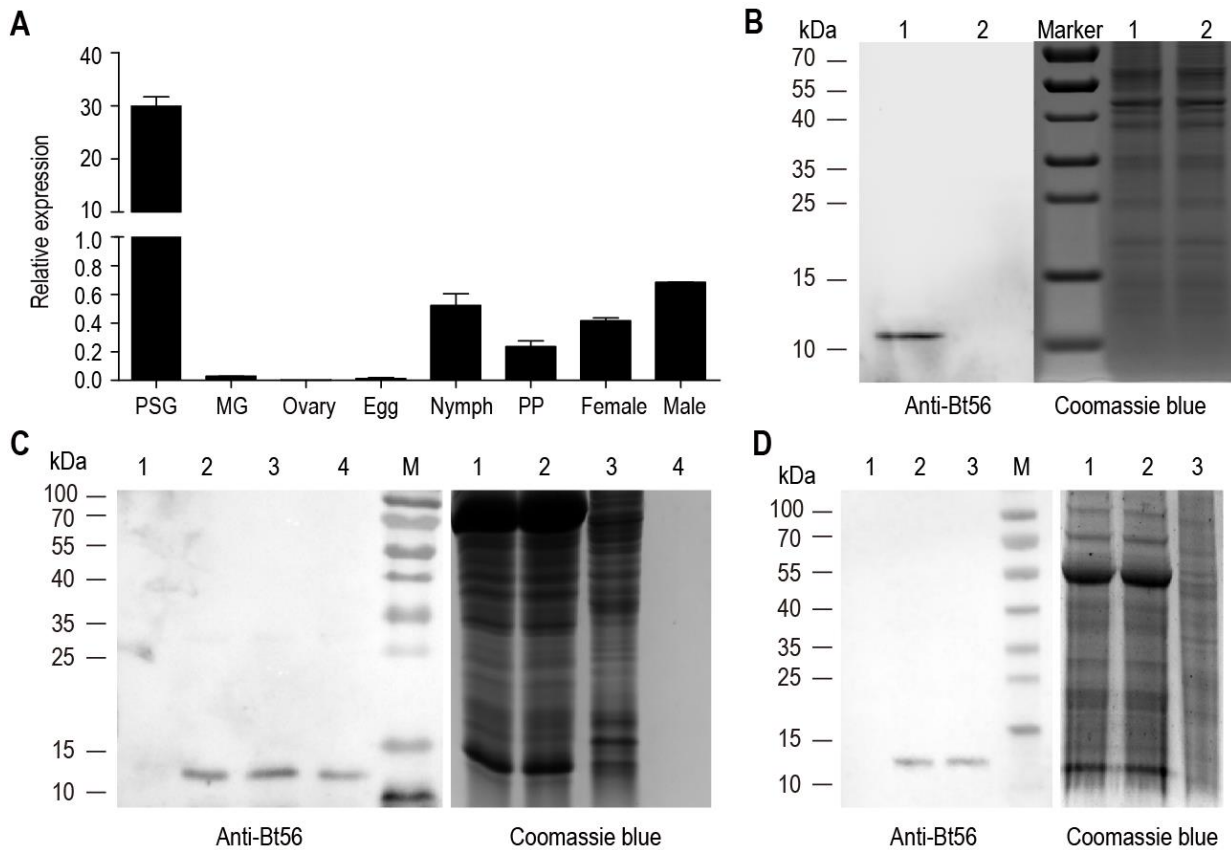

317 **Fig. S4.** *Bt56* gene expression patterns and protein localization. (A) qRT-PCR analysis of *Bt56*  
 318 gene expression in different tissues and whiteflies of different developmental stages (n = 3).  
 319 Values shown are mean  $\pm$  SE of three independent experiments. PSG, primary salivary gland;  
 320 MG, midgut; PP, pseudopupa are whiteflies in the late 4<sup>th</sup> instar with red eyes. (B) Polyclonal  
 321 anti-Bt56 antibody specifically recognizes Bt56 in whitefly. Western blot analyses were  
 322 performed to detect Bt56 protein using protein extracts from whitefly head and thorax (lane 1)  
 323 and abdomen (lane 2). (C and D) Bt56 is a saliva protein and can be secreted into the plant  
 324 during whitefly feeding. Western blot analyses were performed to detect Bt56 protein using  
 325 protein extracts from cotton (C) and tobacco (D). Lane 1, uninfested plant leaf; lane 2, whitefly-  
 326 infested plant leaf; lane 3, whitefly adults; lane 4, whitefly saliva. Coomassie blue staining was  
 327 used to confirm equal loading in lane 1 and lane 2.

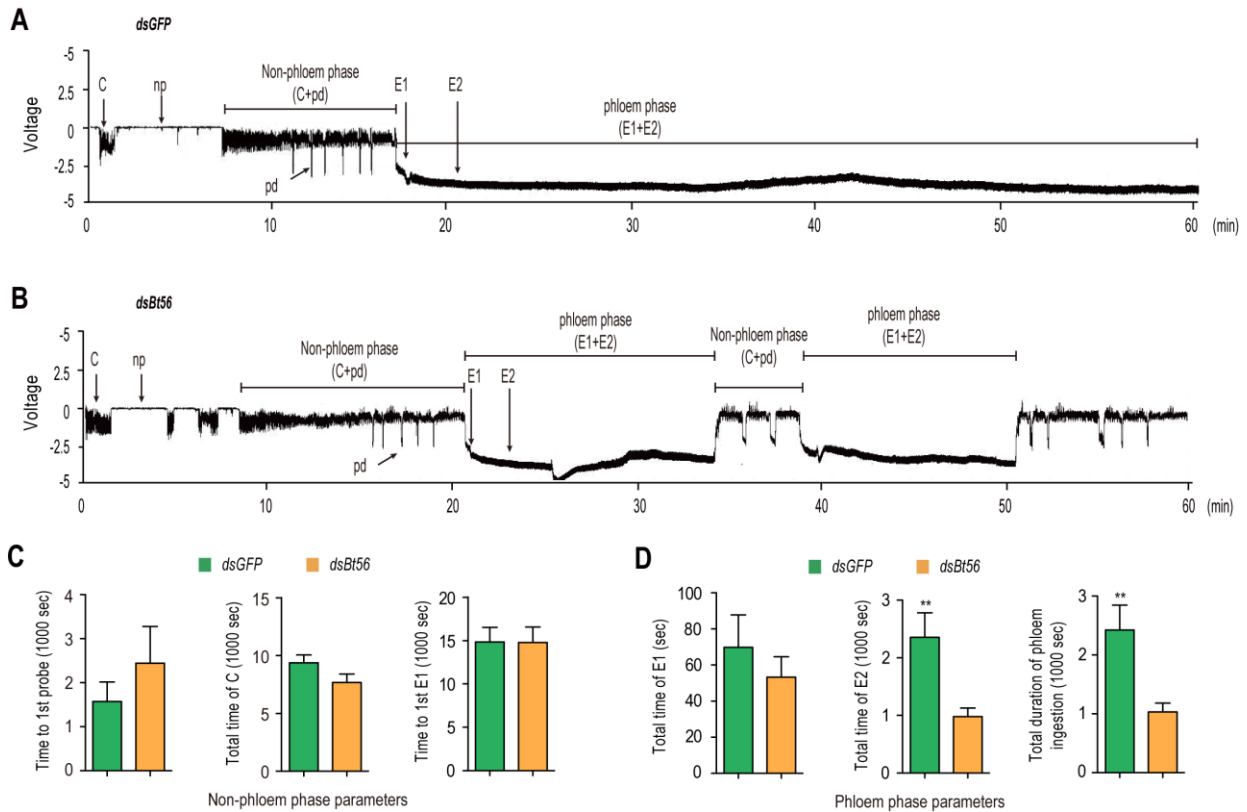

328 **Fig. S5.** Silencing *Bt56* impairs whitefly feeding. Typical EPG waveforms of *dsGFP* (A) and  
 329 *dsBt56*-fed (B) whiteflies on cotton. C, pathway phase; np, nonprobing; pd, potential drop; E1,  
 330 watery salivation; E2, passive phloem ingestion. Comparison of EPG parameters from the non-  
 331 phloem phase (C) and phloem phase (D) in *dsGFP*- and *dsBt56*-fed whiteflies. Values are  
 332 reported as mean + SE, n = 16. All parameters are listed in Table S1. One-way ANOVA, LSD  
 333 test, \*\*  $P < 0.01$ .

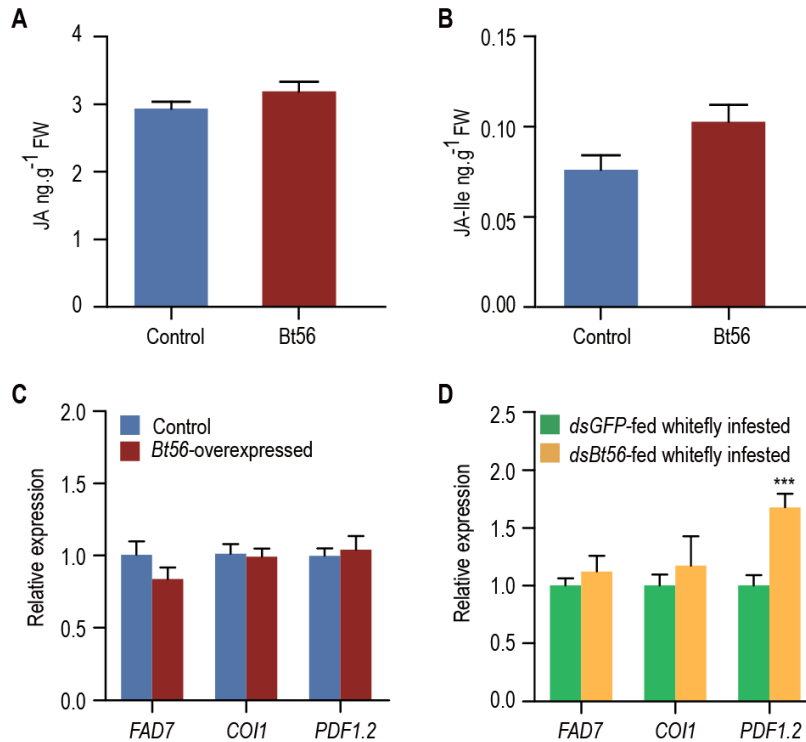

334 **Fig. S6. The effect of Bt56 on tobacco JA-signaling pathway.** (A-B) The effect of  
 335 overexpressing Bt56 on tobacco JA and JA-Ile levels. The levels of JA (A) and JA-Ile (B) were  
 336 measured 48 h after agroinfiltration. (C) The expression levels of JA defense-marker genes in  
 337 tobacco with overexpression of *Bt56* were measured 48 h after agroinfiltration. (D) The effect  
 338 of infestation by *Bt56*-silenced whiteflies on tobacco JA-signaling pathway. The expression  
 339 levels of JA defense-marker genes were measured three days after infestation by *dsGFP*- and  
 340 *dsBt56*-fed whiteflies. Data shown are mean  $\pm$  SE, n = 12 for gene expression on *Bt56*  
 341 overexpressed tobacco and n = 8 for *dsRNA*-fed whitefly infested tobacco. One-way ANOVA,  
 342 LSD test, \*\*\*  $P < 0.001$ .

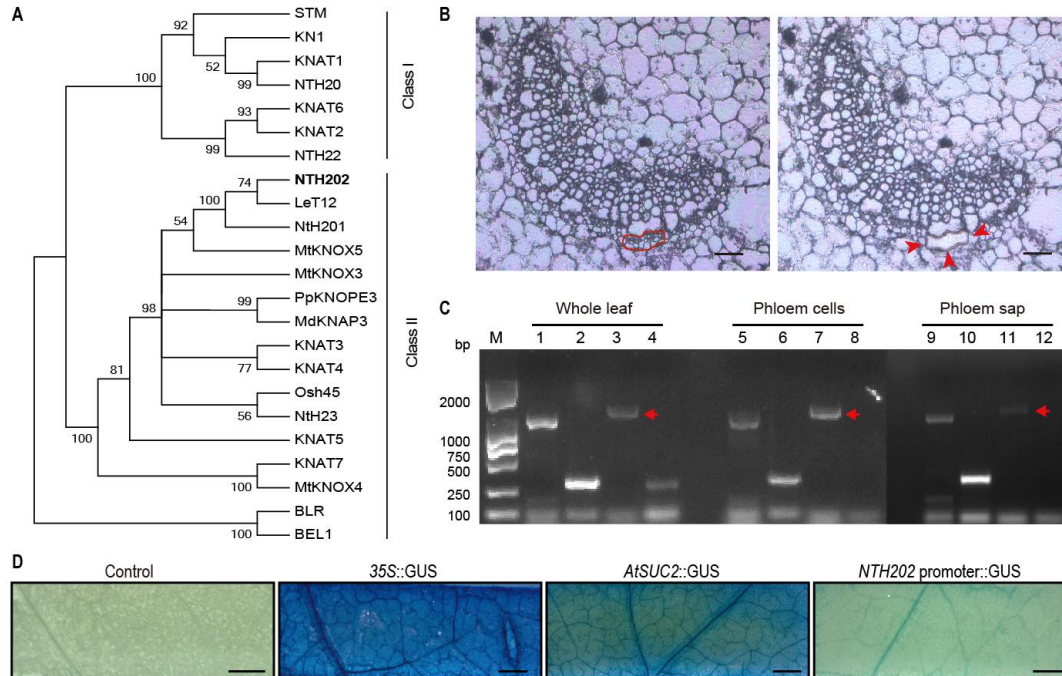

343 **Fig. S7. Phloem expression of *NTH202* in tobacco leaf.** (A) Phylogenetic tree of *NTH202*  
 344 protein sequences. Tobacco *NTH202* protein in this study is shown in bold. (B) Laser capture  
 345 microdissection from tobacco leaf sections. Left, before microdissection; right, after  
 346 microdissection. Redline and arrowheads indicate the location of phloem cells captured. Bar,  
 347 100  $\mu$ m. (C) RT-PCR products from RNA extracted from whole leaf, LCM-captured phloem  
 348 cells and phloem sap. Expression of the *NTH202* gene (lane 3, 7 and 11, red arrows indicate the  
 349 band) could be detected in whole leaf, phloem cells and phloem sap. *APL* (lane 1, 5 and 9) and  
 350 *TRXH* (lane 2, 6 and 10), the phloem-specific genes, are used as marker of phloem tissue, and  
 351 *Rubisco* (lane 4, 8 and 12) is used as a marker of contamination by non-phloem tissue (10-12).  
 352 (D) *NTH202* promoter activity assays using GUS as a reporter gene. The *NTH202*  
 353 promoter::GUS activity can be detected in the vascular tissues of tobacco leaves 2 days after  
 354 *Agrobacterium* mediated transient expression. Empty *Agrobacterium* used as negative control,  
 355 *CMV 35S* promoter and *Arabidopsis* phloem-specific promoter *AtSUC2* used as positive  
 356 control. Bars = 1 mm.

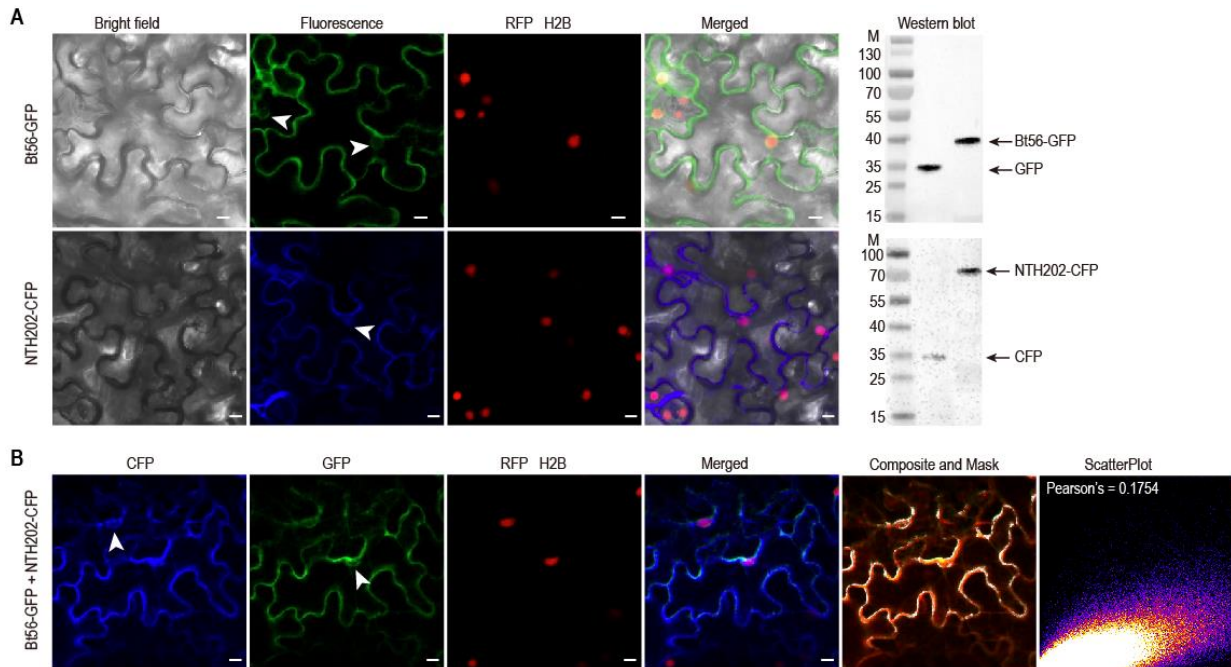

357 **Fig. S8. Co-localization of Bt56 and plant NTH202 transcription factors.** (A-B) Constructs  
 358 containing NTH202 fused with CFP and Bt56 fused with GFP driven by 35S promoter were  
 359 infiltrated into *N. benthamiana* leaf by agroinfiltration respectively (A) or simultaneously (B).  
 360 Two days after infiltration, excised leaves were observed under a confocal microscope. Western  
 361 blots show the presence of full-length fusion proteins. White arrowheads indicate nuclear  
 362 localization. The experiments were repeated three times and a total of 18 images were analyzed  
 363 for each treatment. The colocalization level was analyzed by ImageJ (<http://imagej.net/>). The  
 364 scattered plot represents the colocalization level in the composite mask. Co-localization  
 365 between Bt56-GFP and NTH202-CFP was quantified as  $0.231 \pm 0.017$  (Pearson's coefficient,  
 366 mean  $\pm$ SE. n = 18 images). Scale bar = 10  $\mu$ m.

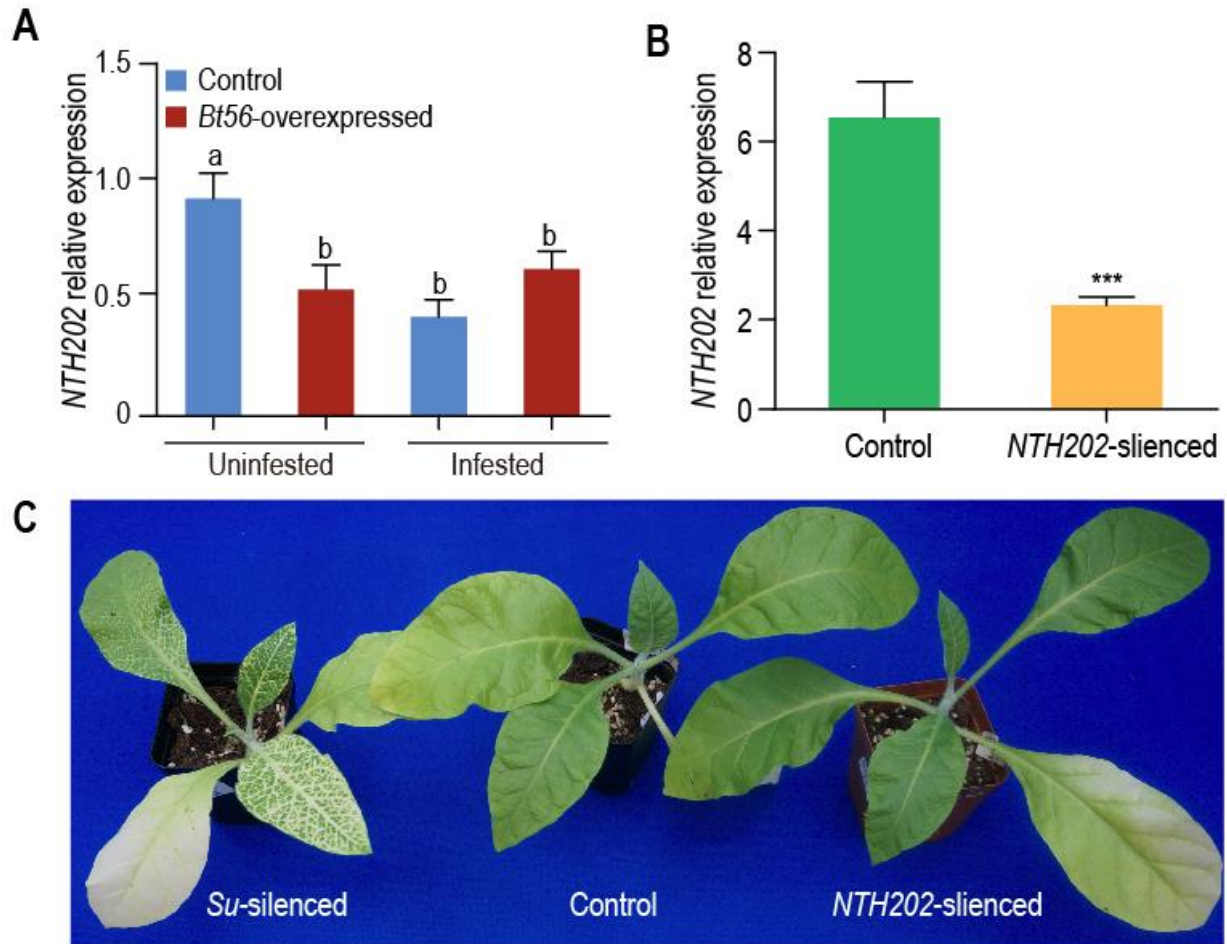

367 **Fig. S9. *NTH202* gene expression in tobacco plants of different treatments.** (A) Relative  
 368 gene expression of *NTH202* in control, *Bt56*-overexpressed, whitefly-infested control and  
 369 infested *Bt56*-overexpressed *N. tabacum* plants (n = 7). (B) Relative expression levels of  
 370 *NTH202* in control and *NTH202*-silenced *N. tabacum* plants (n = 6). Values shown are means  $\pm$   
 371 SE, One-way ANOVA followed by LSD test. Letters above the bars indicate significant  
 372 difference  $P < 0.05$ , \*\*\*  $P < 0.001$ . (C) VIGS to suppress *NTH202* gene in *N. tabacum*.  
 373 Tobacco endogenous gene *Su* (*Sulphur desaturase*) was silenced by VIGS as a positive control  
 374 to visualize the silencing process, and empty vector used as negative control.



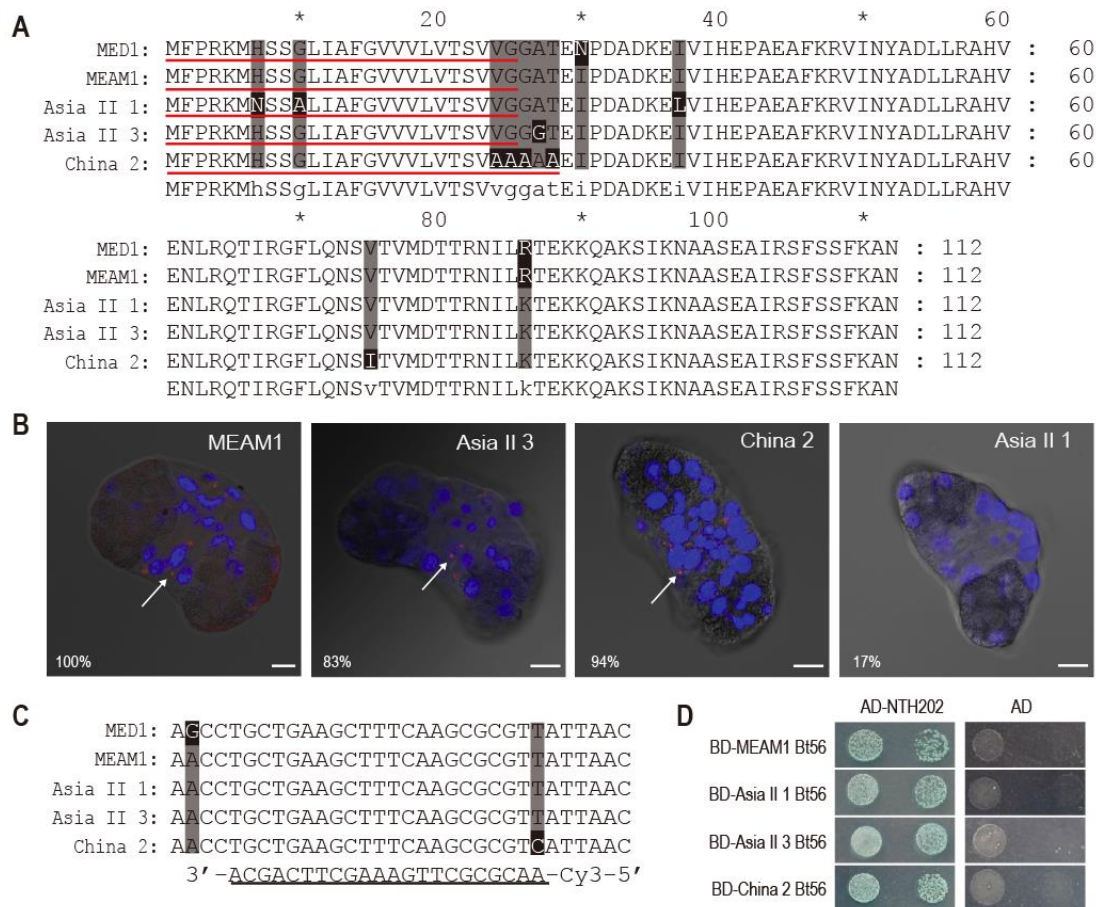

375 **Fig. S10. Sequence analysis and location of *Bt56* genes in different whitefly species. (A)**

376 Alignment of protein sequence of *Bt56* in MED1, MEAM1, Asia II 1, Asia II 3 and China 2

377 whiteflies. The predicted signal peptides are shown in red underline and the shaded areas

378 indicate the differential amino acids. (B) Fluorescence *in situ* hybridization (FISH) to detect the

379 transcripts of *Bt56* in different whitefly species. The percentages shown on the image represent

380 the ratios of positive signals from 18 dissected PSGs. Arrows indicate the fluorescence signals.

381 (C) Alignment of the probe sequence to the five *Bt56* genes. The underline shows the probe

382 sequence. The mismatches are highlighted in shading. (D) *Bt56* from different whiteflies

383 interact with NTH202 in the yeast two-hybrid system. Yeast strain Y2H Gold co-transformed

384 with the indicated plasmids was spotted on quadruple dropout medium (SD/-Ade/-His/-Leu/-

385 Trp supplemented with X- $\alpha$ -Gal and Aureobasidin A).

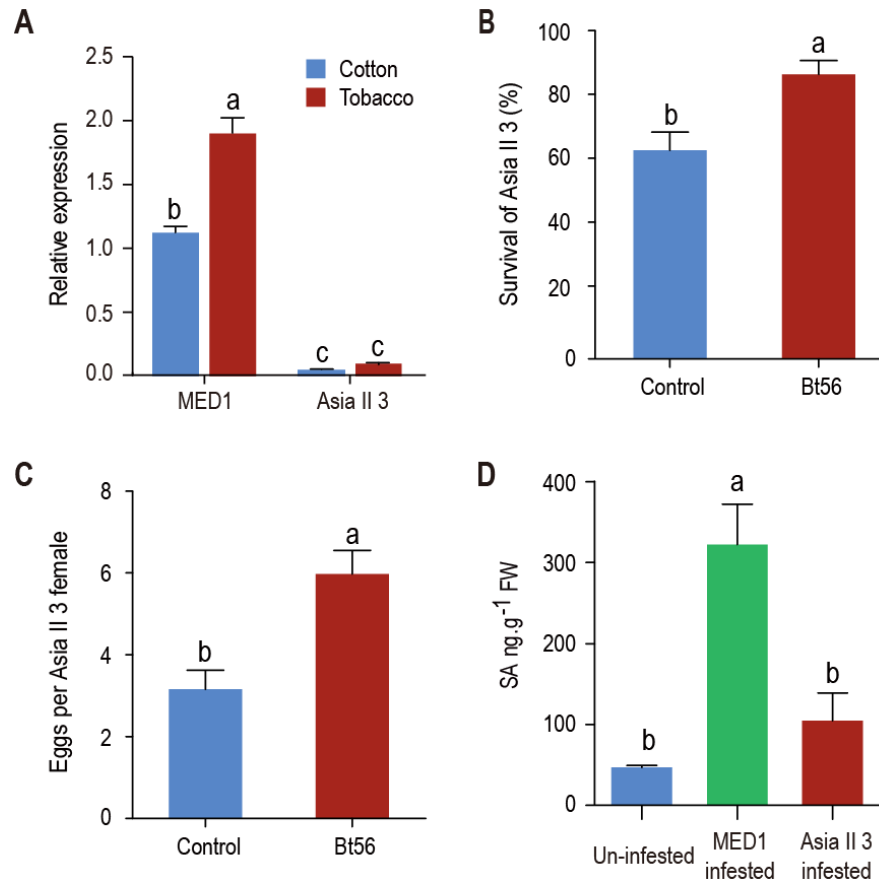

386 **Fig. S11. Expression level of *Bt56* affects whitefly performance on host plants.** (A) The  
 387 expression patterns of *Bt56* in MED1 and Asia II 3. Whiteflies were transferred from cotton to  
 388 cotton and cotton to tobacco separately. After 24 h, the whiteflies were collected for gene  
 389 expression analysis by qRT-PCR (n = 3). (B-C) The effects of overexpression of Asia II 3 *Bt56*  
 390 gene in tobacco on the performance of Asia II 3. Each treatment included 8 plants and each  
 391 plant had 2 clip cages (n = 16). (D) When tobacco was infested by MED1 or Asia II 3  
 392 whiteflies for three days, the level of SA was measured in plants (n = 5-6). Data shown are  
 393 mean  $\pm$ SE; letters above the bars indicate significant differences among different treatments at  
 394  $P < 0.05$  (Nested ANOVA for whitefly bioassays and one-way ANOVA followed by LSD test  
 395 for other experiments).
